# Supplementary material for: Photonic nanorods with magnetic responsiveness regulated by lattice defects
Source: Royal Society of Chemistry journal article supplement (doi:10.1039/c6nr10022h), 2017-01-01
Supplement: c6nr10022h1.pdf [file c6nr10022h1.pdf]

## Electronic Supplementary Information (ESI)

### Photonic nanorods with magnetic responsiveness regulated by lattice defects

Huiru Ma,<sup>a,b</sup> Kai Tang,<sup>b</sup> Wei Luo,<sup>a</sup> Lin Ma,<sup>a</sup> Qian Cui,<sup>a</sup> Wei Li,<sup>a</sup> and Jianguo Guan\*,<sup>a</sup>

<sup>a</sup> *State Key Laboratory of Advanced Technology for Materials Synthesis and Processing, International School of Materials Science and Engineering, Wuhan University of Technology, Wuhan, 430070, China.*

\*Corresponding author Tel.: +86-27-87218832; Fax: +86-27-87879468. E-mail address: [guanjg@whut.edu.cn](mailto:guanjg@whut.edu.cn).

<sup>b</sup> *Department of Chemistry, School of Chemistry, Chemical Engineering and Life Science, Wuhan University of Technology, Wuhan, 430070, China.*

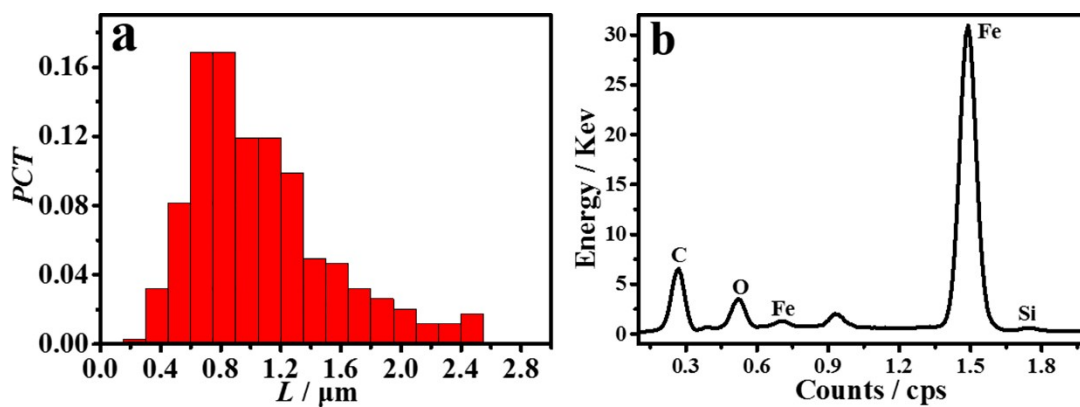

**Fig. S1** The length distribution diagram (a) and EDS spectrum of the typical  $\text{Fe}_3\text{O}_4@\text{PVP}@\text{SiO}_2$  photonic nanorods.

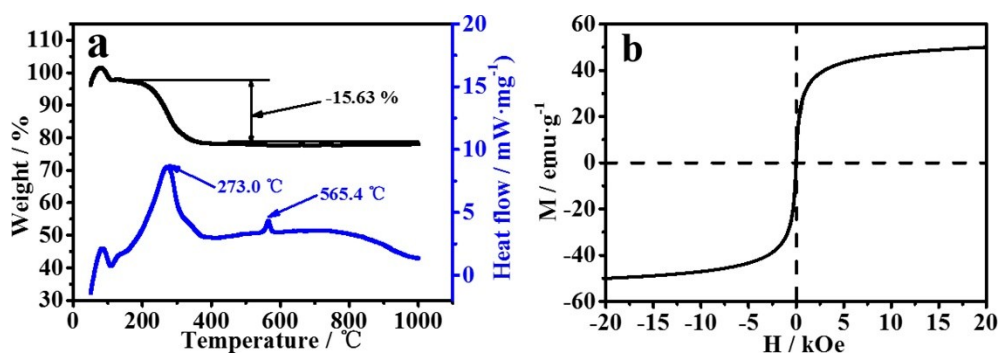

**Fig. S2** (a) TG-DSC curves and (b) hysteresis loop at 300 K of  $\text{Fe}_3\text{O}_4@\text{PVP}$  CNCs particles.

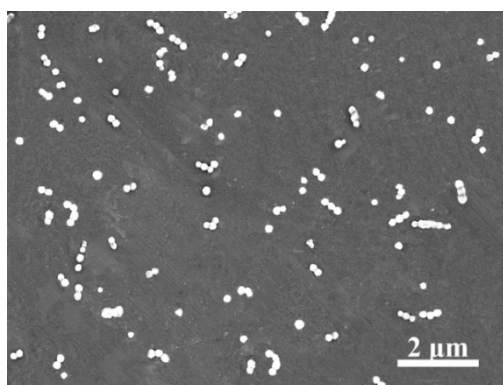

**Fig. S3** SEM image of the sample obtained after reacting 5 minutes under 200 Gs.

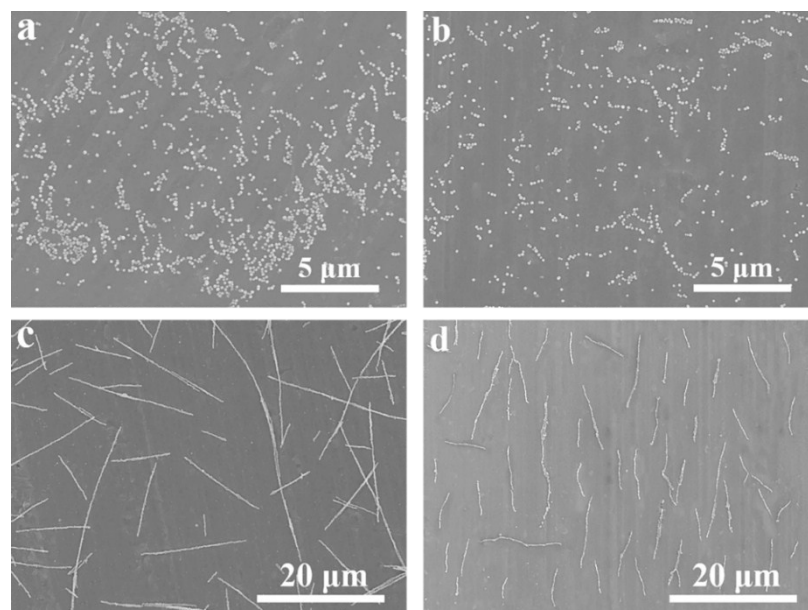

**Fig. S4** SEM images of the samples obtained by the catalyzed hydrolysis-condensation of (a, b) WD-80 with (a) ammonia, (b) HCl aqueous solution; (c, d) TEOS with (c) ammonia or (d) PAA aqueous solution.

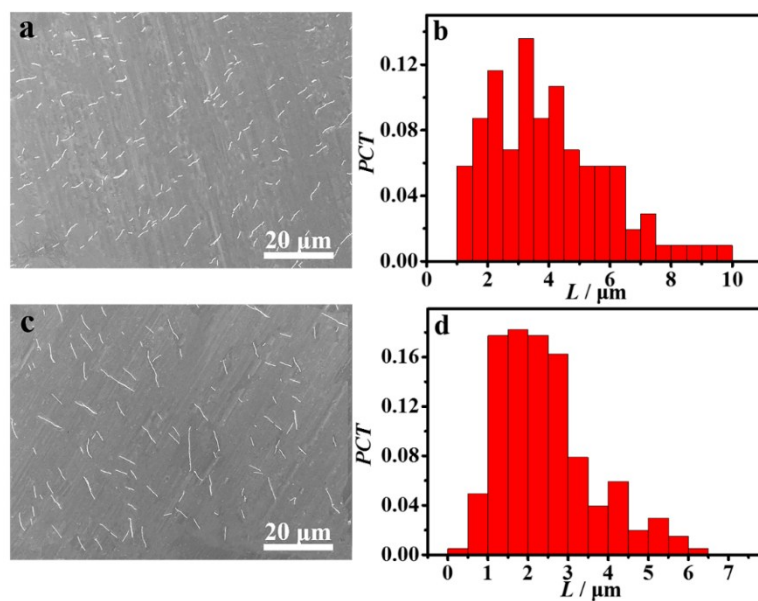

**Fig. S5** (a, c) SEM images and (b, d) length distribution diagrams of the  $\text{Fe}_3\text{O}_4@\text{PVP}@\text{SiO}_2$  photonic nanorods sample with different average length of 2.44 and 3.98  $\mu\text{m}$ .
